# Supplementary material
Source: publisher figshare collection journal article supplement (https://acs.figshare.com/ndownloader/files/5179081)

Supporting information with:

**Mapping of the binding site on pseudoazurin in the transient 152 kDa complex with nitrite reductase**

Antonietta Impagliazzo and Marcellus Ubbink

**Protocol for the production of deuterium labelled PAZ in *Escherichia coli*.**

Part of the PAZ gene coding for the mature protein was subcloned in pET-28a(+), creating a plasmid for expression in the cytoplasm of *Escherichia coli*. Protein was produced in *E. coli* strain HMS174 in a M9 minimal medium containing 0.7 g/L  $^{15}\text{NH}_4\text{Cl}$  and 5 g/L Na-acetate- $\text{d}_3$ . Cultures were incubated at 37°C with a shaking speed of 250 rpm. *E. coli* was adapted for growth in  $\text{D}_2\text{O}$  by increasing the percentage of  $\text{D}_2\text{O}$  in consecutive 5 ml cultures from 0% to 50%, 80%, 95% and 99.9%. The cultures were used for inoculation (at a ratio 1:5) when their  $\text{OD}_{600}$  was 0.4. In this way cells slowly adapted first to the deuterated carbon source and then to the deuterated medium. The final preculture was diluted several times to a ratio 1:5. Each dilution to a larger volume was done upon reaching  $\text{OD}_{600} = 0.4$ . The final volume was 1 litre. In this way, the bacteria remained in the exponential growth phase during the dilution steps. In the final culture, expression was induced at  $\text{OD}_{600} = 0.6$  with 0.5 mM IPTG, and 100  $\mu\text{M}$  copper citrate was added. Cultures were harvested at  $\text{OD}_{600} = 0.9$  by centrifugation, 10 h after induction. From the first dilution step until harvest took 7 days. After centrifugation, the cell pellet was resuspended in 20 mM phosphate buffer pH 7.0 containing 500 mM NaCl, 1 mM PMSF, DNase, 0.5 mM  $\text{CuCl}_2$  and lysed using a French pressure cell (15.000 PSIG). After centrifugation for 15 min at 10.000 rpm supernatant was dialysed against 20mM phosphate buffer pH 7.0 and loaded onto a CM column equilibrated with the same buffer. PAZ eluted at circa 90 mM using a gradient of 0-250mM NaCl. The fractions containing PAZ were concentrated and purified further on a Superdex 75 FPLC gel filtration column. The 277/595 absorbance ratio of PAZ was 1.9 indicating a purity >95%. The yield was 7.5 mg/L and the deuteration level of the aliphatic protons was determined by mass spectrometry to be 93%.

NMR samples containing 100  $\mu\text{M}$   $^2\text{H}$ - $^{15}\text{N}$ -PAZ with or without 23  $\mu\text{M}$  T2D-NiR were left for 8 h at room temperature and 2 days at 4 °C in a buffer solution of 90%  $\text{D}_2\text{O}$  / 10%  $\text{H}_2\text{O}$  to allow for equilibration of the amide exchange process.

**$^1\text{H}$ - $^{15}\text{N}$  TROSY-SPECTRUM** of  $^2\text{H}$ - $^{15}\text{N}$  PAZ Cu (I) 1mM  
in 10% $\text{H}_2\text{O}$ /90% $^2\text{H}_2\text{O}$  potassium phosphate buffer 20 mM pH 6.5

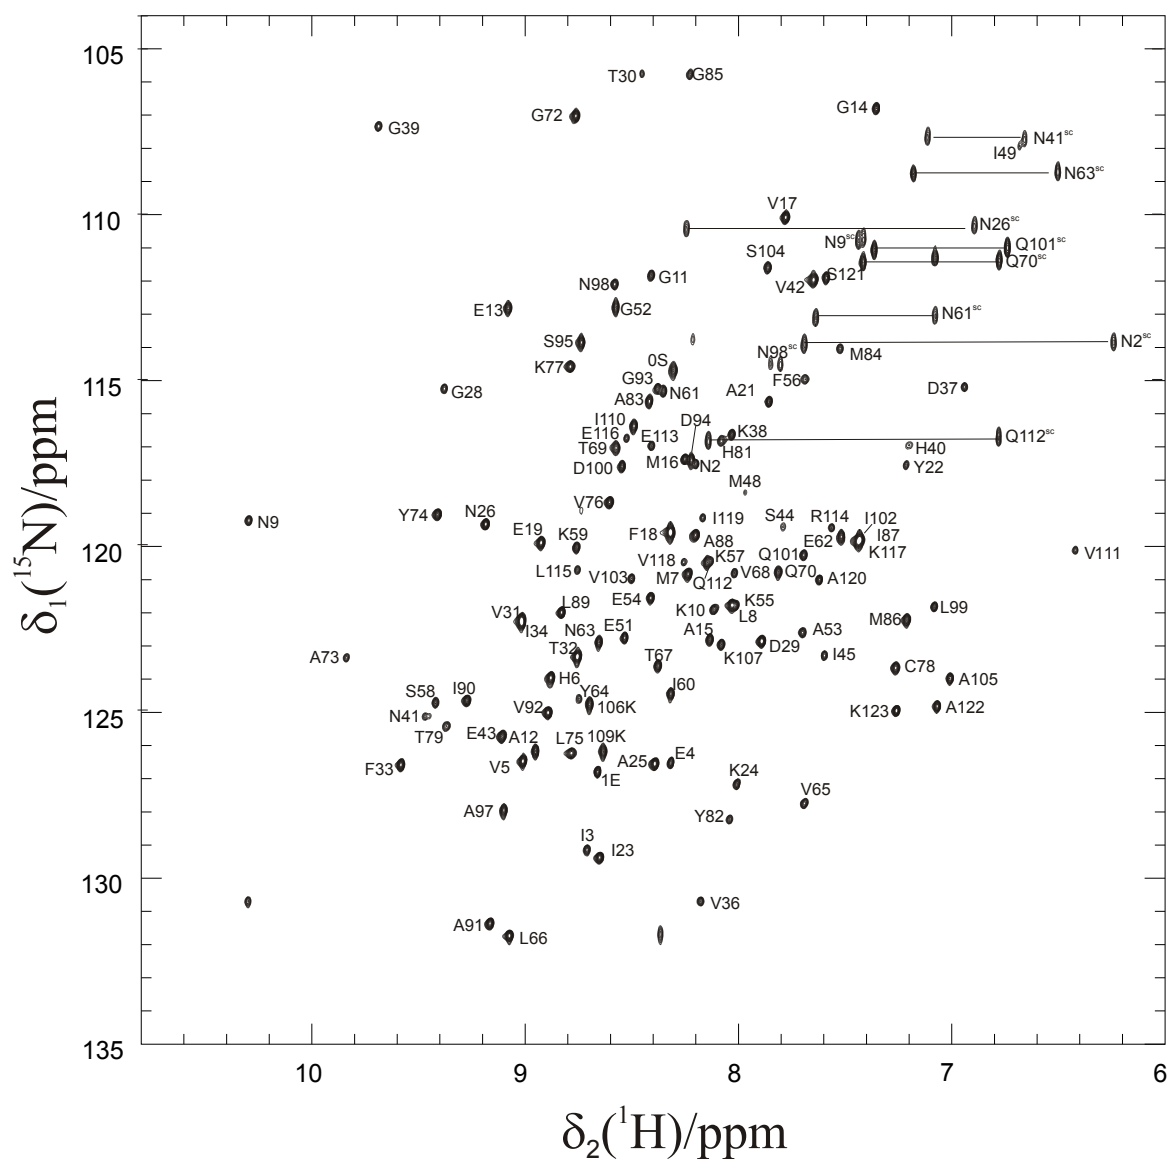

Figure 1 is a scatter plot showing the correlation between  $\delta_2(^1\text{H})/\text{ppm}$  (x-axis, ranging from 6 to 10) and  $\delta_1(^{15}\text{N})/\text{ppm}$  (y-axis, ranging from 105 to 135). The plot displays data points for 100 proteins, each labeled with its name. A dashed line represents the linear fit to the data. Horizontal bars extending from the right side of each data point indicate the  $1\text{-}\sigma$  error for the  $\delta_1(^{15}\text{N})$  value. The plot shows a clear negative correlation between the two chemical shift parameters.

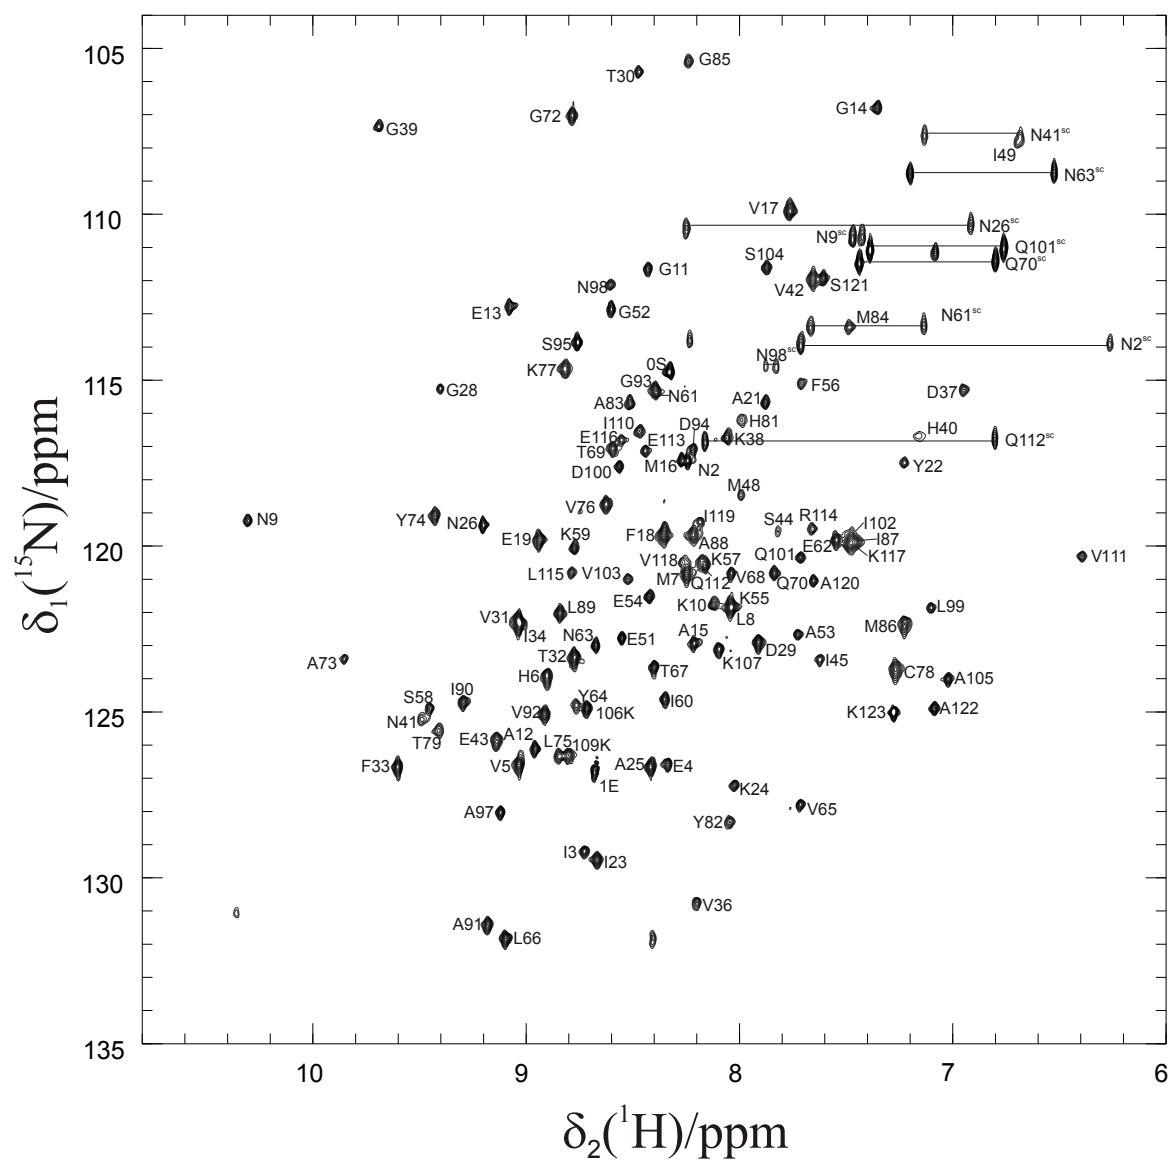

Supplement: Supplementary file 1 [file 5179081]
